# Supplementary material for: Synthesis and optical characterization of infra-red emitting mercury sulfide (HgS) quantum dots
Source: Royal Society of Chemistry journal article supplement (doi:10.1039/c1jm10363f), 2011-01-01
Supplement: c1jm10363f.pdf [file c1jm10363f.pdf]

# Synthesis and optical characterization of infra-red emitting mercury sulphide (HgS) quantum dots

Wijittra Wichiansee,<sup>a</sup> Muhammad N. Nordin,<sup>b</sup> Mark Green<sup>\*a</sup> and Richard J. Curry<sup>\*b</sup>

## Supplementary Information

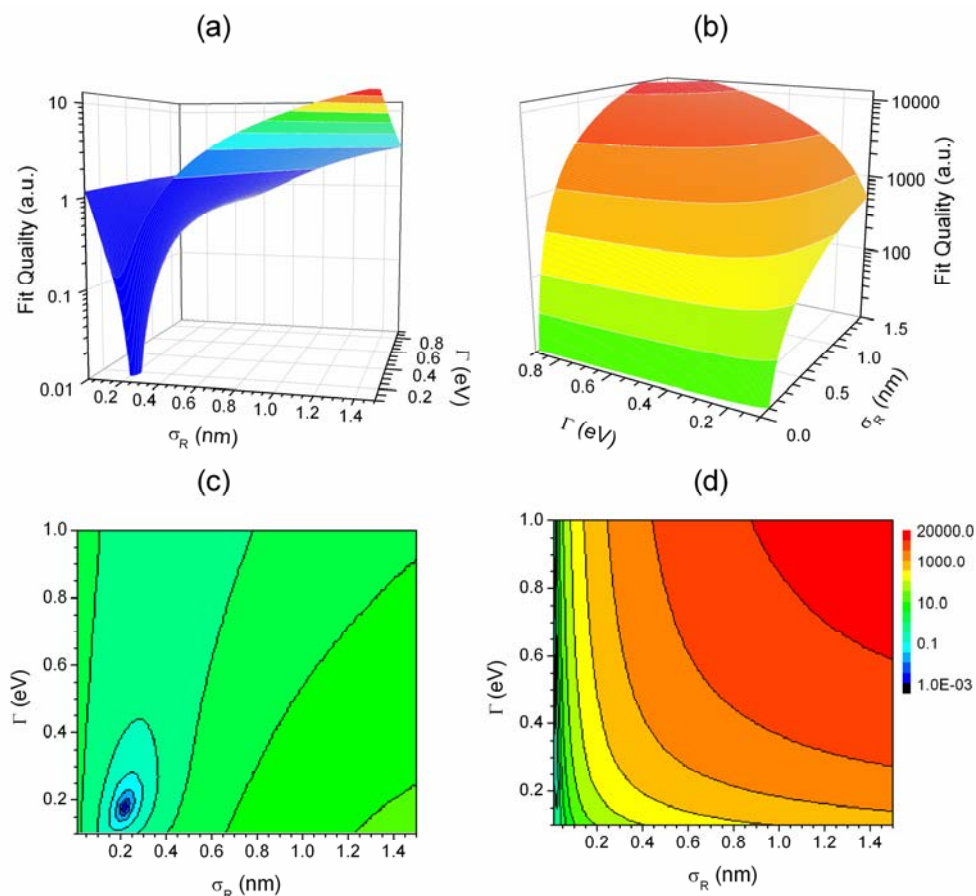

**Fig. S1.** Quality of fit obtained using equation (1) assuming a Gaussian (a) and (c) and Lorentzian (b) and (d) homogeneous lineshape. The scale bar in (d) also applies to (a) – (c). The ‘fit quality’ parameter is minimised when the best fit is obtained. It is clear that the fitting using a Gaussian lineshape converges unlike when the Lorentzian lineshape is used.
